# Supplementary material
Source: publisher figshare collection journal article supplement (https://tandf.figshare.com/articles/dataset/_/20059316)
Supplement: Supplementary file 1 [file 1]

**Supplementary File**

**Figure-S1:** Some commercially available antibacterial drugs.

**Table-S1: Primer used in this study**

| **Primer** | **Sequence (5’–3’)** | **Reference** |
| --- | --- | --- |
| *icaA* | GAGGTAAAGCCAACGCACTC | [42] |
| CCTGTAACCGCACCAAGTTT |
| *icaD* | ACCCAACGCTAAAATCATCG |
| GCGAAAATGCCCATAGTTTC |
| *SpA* | GCGCAACACGATGAAGCTCAACAA | [43] |
| ACGTTAGCACTTTGGCTTGGATCA |
| *16s rRNA* | CTGGTAGTCCACGCCGTAAAC |
| CAGGCGGAGTGCTTAATGC |
