# Supplementary material
Source: publisher figshare collection journal article supplement (https://tandf.figshare.com/articles/dataset/_/20059316)
Supplement: Supplementary file 2 [file 1]

File: RSE-02-MS

Date Run: 11-10-2021 (Time Run: 16:00:36)

Sample: MEHWISH SOLANGI /PROF. DR. KHALID

Instrument: JEOL 600H-1

Run By: MASS LAB 104

Inlet: Direct Probe

Ionization mode: EI+

Scan: 23-27

Base: m/z 318; 10.2%FS TIC: 525388

#Ions: 227

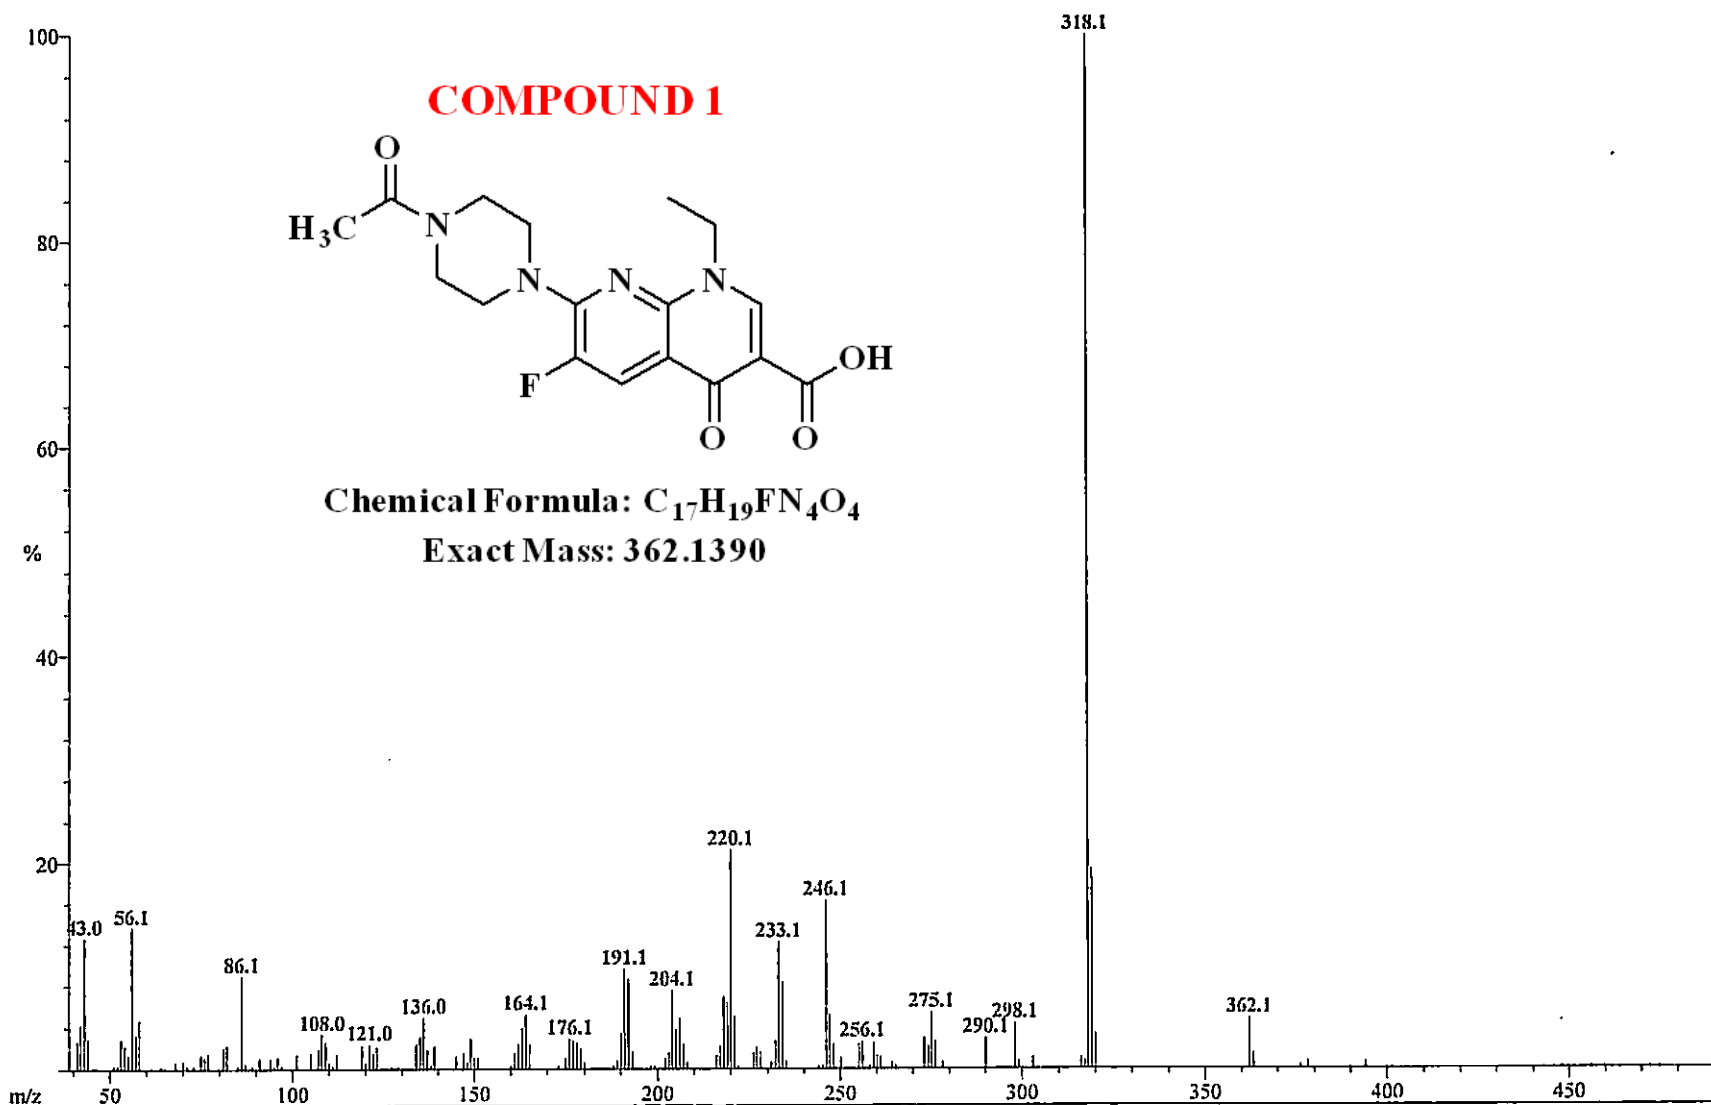

File: RSE-02-MS Date Run: 11-10-2021 (Time Run: 16:00:36)  
Sample: MEHWISH SOLANGI /PROF. DR. KHALID  
Instrument: JEOL 600H-1  
Inlet: Direct Probe Ionization mode: EI+

Run By: MASS LAB 104

Scan: 23-27  
Base: m/z 318; 10.2%FS TIC: 525388

#Ions: 227

Threshold: .5% of Base

Displayed TIC: 525388

| Mass | %Base | Mass  | %Base | Mass  | %Base | Mass  | %Base | Mass  | %Base | Mass  | %Base | Mass  | %Base | Mass  | %Base |
|------|-------|-------|-------|-------|-------|-------|-------|-------|-------|-------|-------|-------|-------|-------|-------|
| 41.0 | 2.7   | 81.0  | 2.1   | 120.1 | .7    | 161.1 | 1.6   | 193.1 | 1.8   | 227.1 | 2.2   | 261.1 | 1.2   | 320.1 | 3.4   |
| 42.0 | 4.3   | 82.0  | 2.3   | 121.0 | 2.4   | 162.0 | 2.5   | 202.1 | 1.1   | 228.1 | 1.7   | 264.1 | .7    | 362.1 | 4.8   |
| 43.0 | 12.7  | 86.1  | 9.0   | 122.1 | 1.5   | 163.1 | 4.0   | 203.1 | 1.6   | 231.1 | .7    | 273.1 | 3.0   | 363.2 | 1.6   |
| 44.0 | 2.9   | 87.1  | .6    | 123.1 | 2.2   | 164.1 | 5.3   | 204.1 | 7.6   | 232.1 | 2.7   | 274.1 | 2.3   |       |       |
| 53.0 | 2.9   | 91.1  | 1.2   | 134.0 | 2.4   | 165.1 | 2.5   | 205.1 | 3.9   | 233.1 | 12.3  | 275.1 | 5.4   |       |       |
| 54.0 | 2.3   | 94.0  | 1.1   | 135.0 | 3.1   | 175.1 | 1.1   | 206.1 | 4.9   | 234.1 | 8.4   | 276.1 | 2.7   |       |       |
| 55.1 | 1.4   | 96.0  | 1.2   | 136.0 | 5.0   | 176.1 | 3.0   | 207.1 | 2.4   | 235.1 | .9    | 278.1 | .7    |       |       |
| 56.1 | 13.7  | 101.1 | 1.4   | 137.0 | 1.9   | 177.1 | 2.8   | 208.1 | .7    | 246.1 | 16.4  | 290.1 | 3.0   |       |       |
| 57.1 | 3.3   | 105.1 | 1.6   | 139.0 | 2.2   | 178.1 | 2.6   | 216.1 | 1.4   | 247.1 | 5.3   | 298.1 | 4.4   |       |       |
| 58.1 | 4.8   | 107.0 | 2.0   | 145.0 | 1.3   | 179.1 | 2.0   | 217.1 | 2.3   | 248.1 | 2.5   | 299.1 | .8    |       |       |
| 68.1 | .8    | 108.0 | 3.4   | 147.1 | 1.6   | 180.0 | .7    | 218.1 | 7.0   | 250.1 | 1.1   | 303.1 | 1.1   |       |       |
| 70.1 | .8    | 109.1 | 2.7   | 148.1 | .7    | 189.0 | .8    | 219.1 | 6.5   | 255.1 | 2.5   | 316.1 | 1.2   |       |       |
| 75.0 | 1.5   | 110.1 | .7    | 149.1 | 3.0   | 190.1 | 3.5   | 220.1 | 21.3  | 256.1 | 2.6   | 317.1 | .9    |       |       |
| 76.0 | 1.1   | 112.1 | 1.5   | 150.1 | 1.2   | 191.1 | 9.7   | 221.1 | 5.1   | 259.1 | 2.5   | 318.1 | 100.0 |       |       |
| 77.0 | 1.5   | 119.1 | 2.3   | 151.1 | 1.1   | 192.1 | 8.7   | 226.1 | 1.6   | 260.1 | 1.4   | 319.1 | 19.4  |       |       |

File: RSE-05-MS  
Sample: MEHWISH SOLANGI /PROF. DR. KHALID  
Instrument: JEOL 600H-1  
Inlet: Direct Probe

Date Run: 11-10-2021 (Time Run: 15:52:24)

Ionization mode: EI+

Run By: MASS LAB 104

Scan: 25

Base: m/z 414; 100%FS TIC: 9771184

#Ions: 378

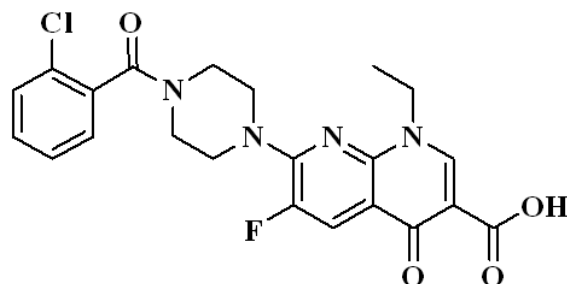

Chemical Formula:  $C_{22}H_{20}ClFN_4O_4$

Exact Mass: 458.1157

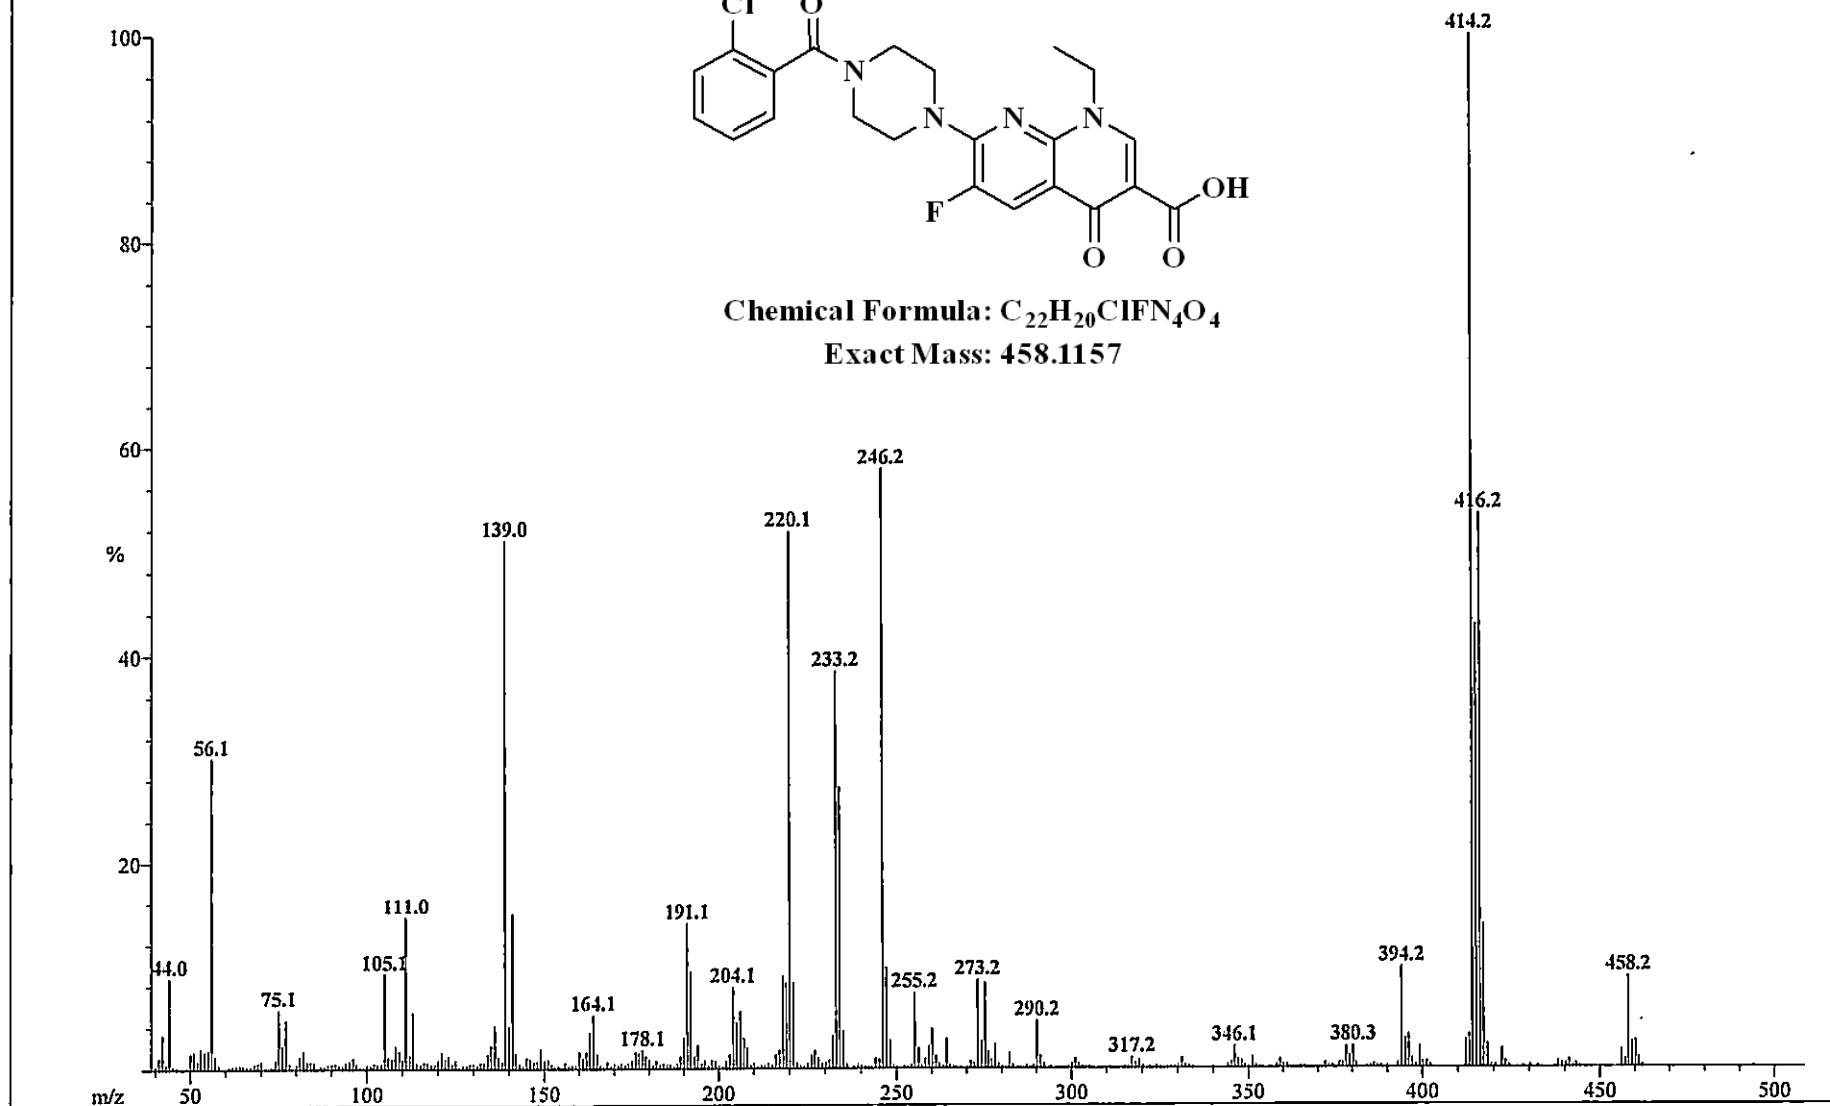

File: RSE-05-MS Date Run: 11-10-2021 (Time Run: 15:52:24)  
Sample: MEHWISH SOLANGI /PROF. DR. KHALID  
Instrument: JEOL 600H-1  
Inlet: Direct Probe Ionization mode: EI+

Run By: MASS LAB 104

Scan: 25  
Base: m/z 414; 100%FS TIC: 9771184

#Ions: 378

Threshold: 1% of Base

Displayed TIC: 9771184

| Mass | %Base | Mass  | %Base | Mass  | %Base | Mass  | %Base | Mass  | %Base | Mass  | %Base | Mass  | %Base | Mass  | %Base |
|------|-------|-------|-------|-------|-------|-------|-------|-------|-------|-------|-------|-------|-------|-------|-------|
| 41.0 | 1.2   | 96.1  | 1.2   | 137.1 | 1.2   | 178.1 | 1.9   | 217.1 | 1.8   | 248.2 | 2.8   | 291.2 | 1.3   | 414.2 | 100.0 |
| 42.0 | 3.3   | 105.1 | 9.2   | 139.0 | 51.0  | 179.1 | 1.3   | 218.2 | 9.0   | 255.2 | 7.4   | 317.2 | 1.1   | 415.2 | 42.9  |
| 44.0 | 8.8   | 106.1 | 1.2   | 140.0 | 4.1   | 189.1 | 1.2   | 219.1 | 8.3   | 256.2 | 2.0   | 331.2 | 1.1   | 416.2 | 53.5  |
| 50.0 | 1.6   | 107.1 | 1.0   | 141.0 | 15.0  | 190.1 | 3.0   | 220.1 | 51.9  | 258.2 | 1.0   | 346.1 | 2.2   | 417.2 | 13.9  |
| 51.0 | 1.8   | 108.1 | 2.3   | 142.0 | 1.6   | 191.1 | 14.1  | 221.2 | 8.3   | 259.2 | 2.2   | 351.2 | 1.1   | 418.3 | 2.3   |
| 53.0 | 2.0   | 109.1 | 1.8   | 145.1 | 1.1   | 192.1 | 9.5   | 226.2 | 1.3   | 260.1 | 3.9   | 378.2 | 2.1   | 422.3 | 1.9   |
| 54.0 | 1.8   | 111.0 | 14.7  | 149.1 | 2.0   | 193.1 | 1.3   | 227.2 | 1.9   | 261.2 | 1.3   | 379.3 | 1.3   | 456.1 | 1.8   |
| 55.1 | 1.9   | 112.1 | 1.4   | 160.1 | 1.7   | 194.1 | 2.3   | 228.1 | 1.1   | 264.1 | 2.9   | 380.3 | 2.1   | 458.2 | 8.8   |
| 56.1 | 30.2  | 113.0 | 5.5   | 161.1 | 1.0   | 203.1 | 1.4   | 232.2 | 3.2   | 273.2 | 8.5   | 394.2 | 9.8   | 459.2 | 2.6   |
| 57.1 | 1.3   | 121.1 | 1.6   | 162.1 | 1.7   | 204.1 | 7.9   | 233.2 | 38.5  | 274.2 | 2.7   | 395.2 | 2.9   | 460.2 | 2.7   |
| 75.1 | 5.8   | 122.1 | 1.0   | 163.1 | 3.5   | 205.1 | 4.5   | 234.2 | 27.4  | 275.2 | 8.3   | 396.2 | 3.3   | 461.2 | 1.1   |
| 76.0 | 2.2   | 123.1 | 1.3   | 164.1 | 5.3   | 206.1 | 5.6   | 235.2 | 3.7   | 276.2 | 1.7   | 397.2 | 1.0   |       |       |
| 77.0 | 4.8   | 134.1 | 1.5   | 165.1 | 1.5   | 207.1 | 3.0   | 244.1 | 1.1   | 278.2 | 2.4   | 399.2 | 2.1   |       |       |
| 81.0 | 1.3   | 135.0 | 2.3   | 176.1 | 1.7   | 208.1 | 2.0   | 246.2 | 57.9  | 282.2 | 1.6   | 412.2 | 2.7   |       |       |
| 82.0 | 1.8   | 136.1 | 4.3   | 177.1 | 1.6   | 216.1 | 1.4   | 247.2 | 9.8   | 290.2 | 4.6   | 413.2 | 3.3   |       |       |

File: RSE-07-MS-  
Sample: MEHWISH SOLANGI /PROF. DR. KHALID  
Instrument: JEOL 600H-1  
Inlet: Direct Probe

Date Run: 11-10-2021 (Time Run: 16:10:01)

Run By: MASS LAB 104

Ionization mode: EI+

Scan: 35-36

Base: m/z 394; 69.4%FS TIC: 8537912

#Ions: 373

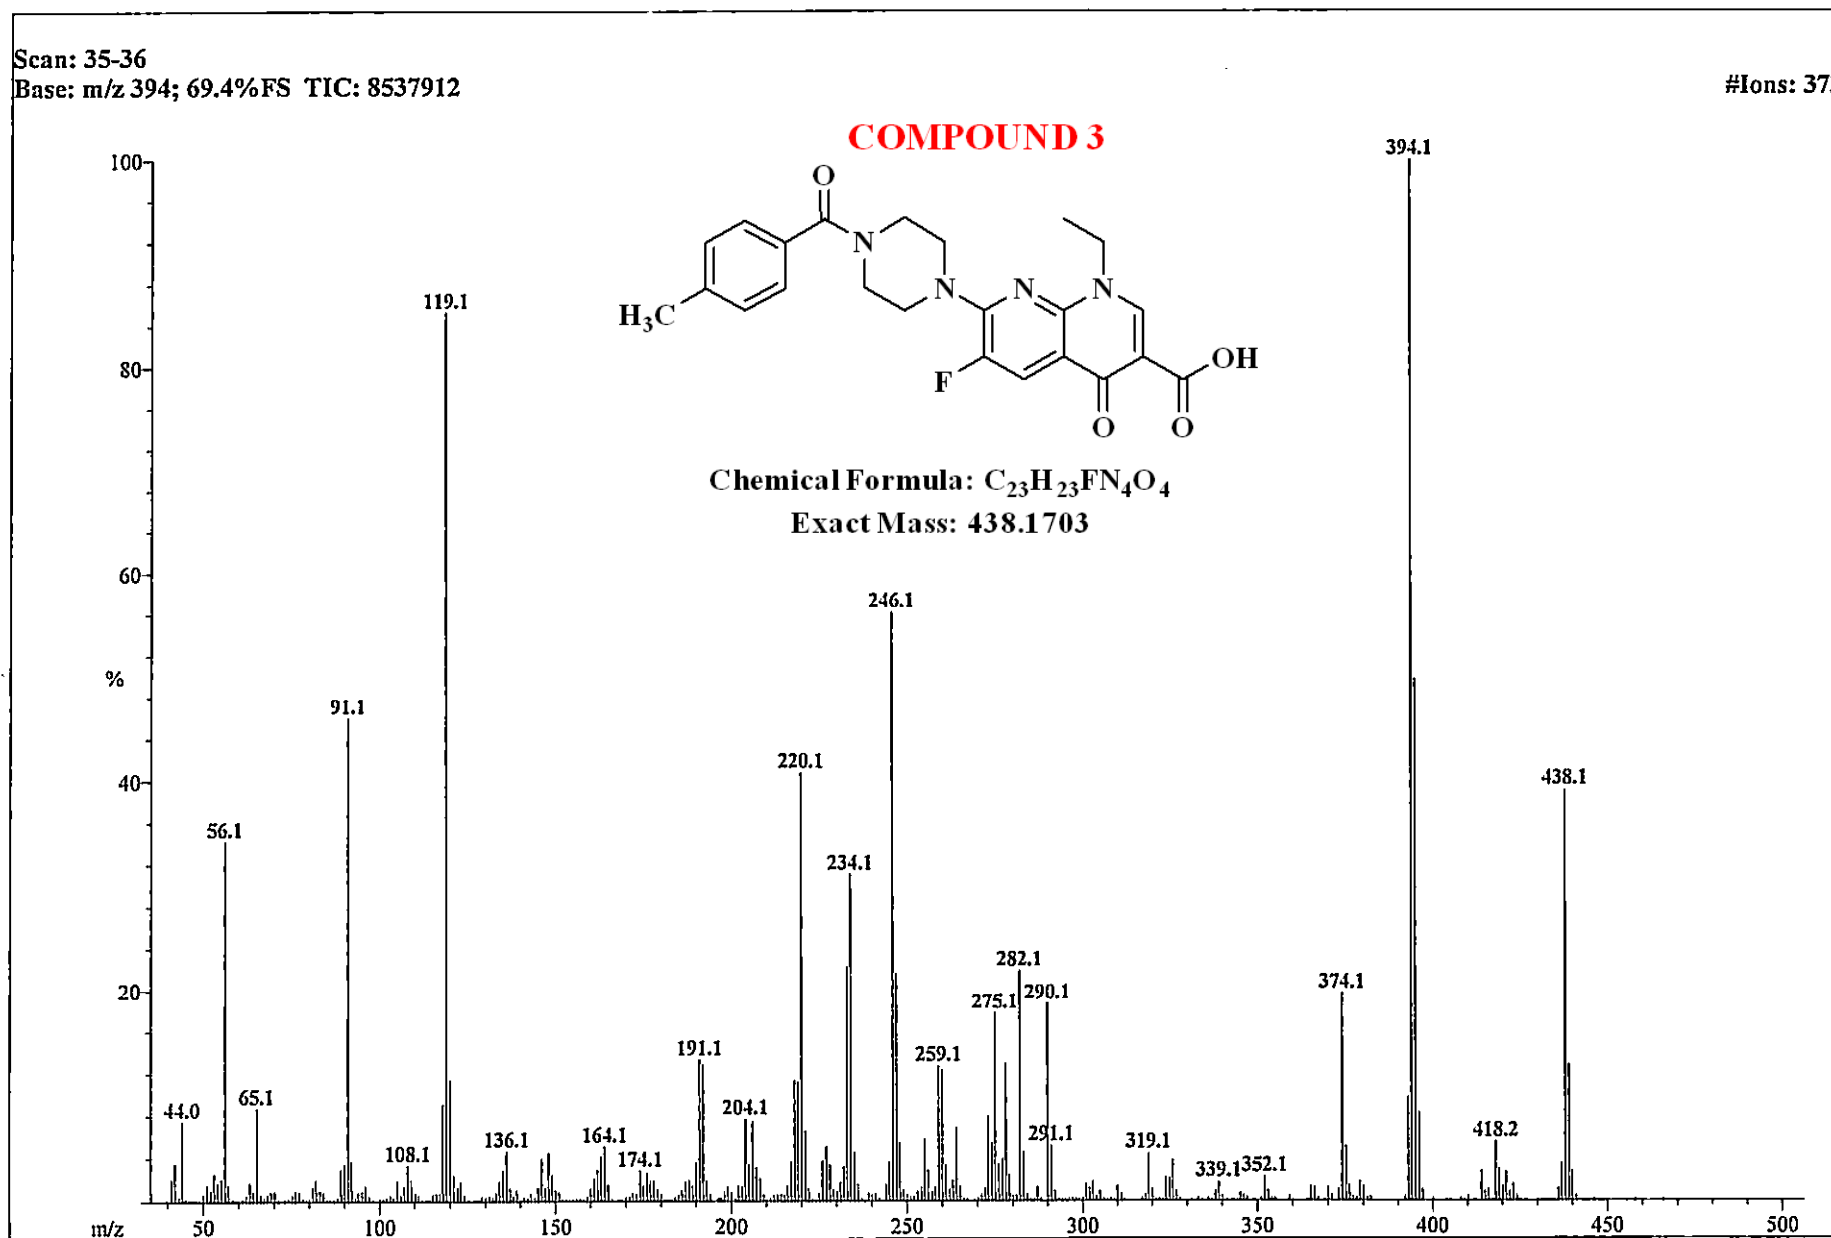

File: RSE-07-MS- Date Run: 11-10-2021 (Time Run: 16:10:01)  
Sample: MEHWISH SOLANGI /PROF. DR. KHALID  
Instrument: JEOL 600H-1  
Inlet: Direct Probe Ionization mode: EI+

Run By: MASS LAB 104

Scan: 35-36  
Base: m/z 394; 69.4%FS TIC: 8537912

#Ions: 373

Threshold: .5% of Base

Displayed TIC: 8537912

| Mass | %Base | Mass  | %Base | Mass  | %Base | Mass  | %Base | Mass  | %Base | Mass  | %Base | Mass  | %Base | Mass  | %Base |
|------|-------|-------|-------|-------|-------|-------|-------|-------|-------|-------|-------|-------|-------|-------|-------|
| 41.1 | 2.1   | 91.1  | 46.1  | 134.1 | 1.9   | 180.1 | .8    | 218.1 | 11.4  | 254.1 | 1.3   | 291.1 | 5.2   | 374.1 | 19.7  |
| 42.1 | 3.6   | 92.1  | 3.8   | 135.1 | 2.9   | 185.1 | .6    | 219.1 | 11.2  | 255.1 | 5.8   | 292.1 | 1.0   | 375.2 | 5.1   |
| 44.0 | 7.5   | 94.0  | .9    | 136.1 | 4.7   | 186.1 | 1.0   | 220.1 | 40.8  | 256.1 | 2.9   | 301.1 | 1.6   | 376.2 | 1.5   |
| 50.1 | .7    | 95.1  | 1.0   | 137.1 | 1.3   | 187.1 | 1.9   | 221.1 | 6.6   | 257.1 | .9    | 302.1 | 1.2   | 379.1 | 1.8   |
| 51.1 | 1.6   | 96.1  | 1.5   | 138.1 | .6    | 188.1 | 2.0   | 222.1 | 1.2   | 258.1 | 1.3   | 303.1 | 1.8   | 380.1 | 1.4   |
| 52.1 | 1.0   | 97.1  | .6    | 139.0 | 1.1   | 189.1 | 1.5   | 225.1 | .8    | 259.1 | 12.8  | 304.0 | .5    | 393.2 | 9.8   |
| 53.0 | 2.6   | 103.1 | .7    | 143.0 | .8    | 190.1 | 3.6   | 226.1 | 3.7   | 260.1 | 12.4  | 305.1 | .9    | 394.1 | 100.0 |
| 54.1 | 1.8   | 105.1 | 2.0   | 145.1 | 1.3   | 191.1 | 13.4  | 227.1 | 5.1   | 261.1 | 3.4   | 310.1 | 1.4   | 395.1 | 49.7  |
| 55.1 | 2.1   | 106.1 | .7    | 146.1 | 4.0   | 192.1 | 12.9  | 228.1 | 3.4   | 262.1 | 1.1   | 311.1 | .7    | 396.1 | 8.3   |
| 56.1 | 34.3  | 107.1 | 1.4   | 147.1 | 1.3   | 193.1 | 1.9   | 229.2 | 1.0   | 263.1 | 1.9   | 318.1 | .7    | 397.1 | 1.1   |
| 57.1 | 1.6   | 108.1 | 3.4   | 148.1 | 4.6   | 194.1 | .7    | 230.1 | .9    | 264.1 | 6.9   | 319.1 | 4.5   | 414.1 | 2.9   |
| 62.1 | .7    | 109.1 | 2.1   | 149.1 | 2.5   | 198.1 | 1.0   | 231.1 | 1.8   | 265.1 | 1.4   | 320.1 | 1.2   | 415.1 | .9    |
| 63.1 | 1.8   | 110.1 | .8    | 150.1 | 1.1   | 199.1 | 1.4   | 232.1 | 3.2   | 271.1 | .6    | 324.1 | 2.2   | 416.1 | 1.1   |
| 64.1 | .9    | 111.1 | .7    | 151.1 | .9    | 200.1 | .8    | 233.1 | 22.3  | 272.1 | 1.3   | 325.1 | 2.2   | 418.2 | 5.5   |
| 65.1 | 8.8   | 115.1 | .7    | 160.1 | 1.2   | 202.1 | 1.4   | 234.1 | 31.1  | 273.1 | 8.0   | 326.1 | 3.8   | 419.2 | 3.0   |
| 66.1 | .7    | 116.1 | .8    | 161.1 | 2.2   | 203.1 | 1.4   | 235.1 | 4.6   | 274.1 | 5.4   | 327.1 | .9    | 420.2 | 1.4   |
| 68.1 | .7    | 117.1 | .8    | 162.1 | 3.0   | 204.1 | 7.7   | 236.1 | 1.6   | 275.1 | 17.8  | 338.2 | 1.0   | 421.2 | 2.7   |
| 69.1 | 1.0   | 118.1 | 9.1   | 163.1 | 4.3   | 205.1 | 3.4   | 239.1 | .8    | 276.1 | 3.5   | 339.1 | 1.8   | 422.2 | .9    |
| 70.1 | 1.0   | 119.1 | 85.4  | 164.1 | 5.1   | 206.1 | 7.5   | 240.1 | .6    | 277.1 | 3.9   | 340.1 | .5    | 423.2 | 1.6   |
| 75.1 | .7    | 120.1 | 11.5  | 165.1 | 1.6   | 207.1 | 3.2   | 241.1 | .7    | 278.1 | 12.9  | 345.2 | .8    | 424.1 | .6    |
| 76.1 | 1.0   | 121.1 | 2.5   | 172.1 | .8    | 208.1 | 2.2   | 244.1 | 1.6   | 279.1 | 2.5   | 346.2 | .6    | 436.1 | 1.2   |
| 77.1 | 1.0   | 122.1 | 1.3   | 173.1 | .7    | 209.1 | .7    | 245.1 | 3.7   | 280.1 | .6    | 352.1 | 2.2   | 437.1 | 3.5   |
| 81.1 | 1.4   | 123.1 | 1.9   | 174.1 | 2.9   | 212.1 | .6    | 246.1 | 56.3  | 281.1 | .6    | 353.1 | 1.0   | 438.1 | 39.1  |
| 82.1 | 2.1   | 124.1 | .7    | 175.1 | 1.5   | 213.1 | .6    | 247.1 | 21.6  | 282.1 | 21.9  | 365.1 | 1.3   | 439.1 | 12.8  |
| 83.1 | 1.0   | 129.1 | .6    | 176.1 | 2.7   | 214.1 | .7    | 248.1 | 5.4   | 283.1 | 4.6   | 366.1 | 1.3   | 440.1 | 2.8   |
| 84.1 | .9    | 131.1 | .6    | 177.1 | 2.0   | 215.1 | .6    | 249.1 | 1.1   | 284.1 | .7    | 370.2 | 1.3   |       |       |
| 89.1 | 3.0   | 132.1 | .5    | 178.1 | 2.0   | 216.1 | 1.5   | 250.1 | .6    | 287.1 | 1.3   | 371.1 | .6    |       |       |
| 90.1 | 3.5   | 133.1 | .9    | 179.1 | 1.2   | 217.1 | 3.7   | 253.1 | 1.0   | 290.1 | 18.7  | 373.2 | 1.1   |       |       |

File: RSE-12-MS  
Sample: MEHWISH SOLANGI / DR. KHALID KHAN  
Instrument: JEOL 600H-1  
Inlet: Direct Probe

Date Run: 11-11-2021 (Time Run: 15:24:52)

Ionization mode: EI+

Run By: MASS LAB 104

Scan: 24

Base: m/z 416; 100%FS TIC: 3461504

#Ions: 238

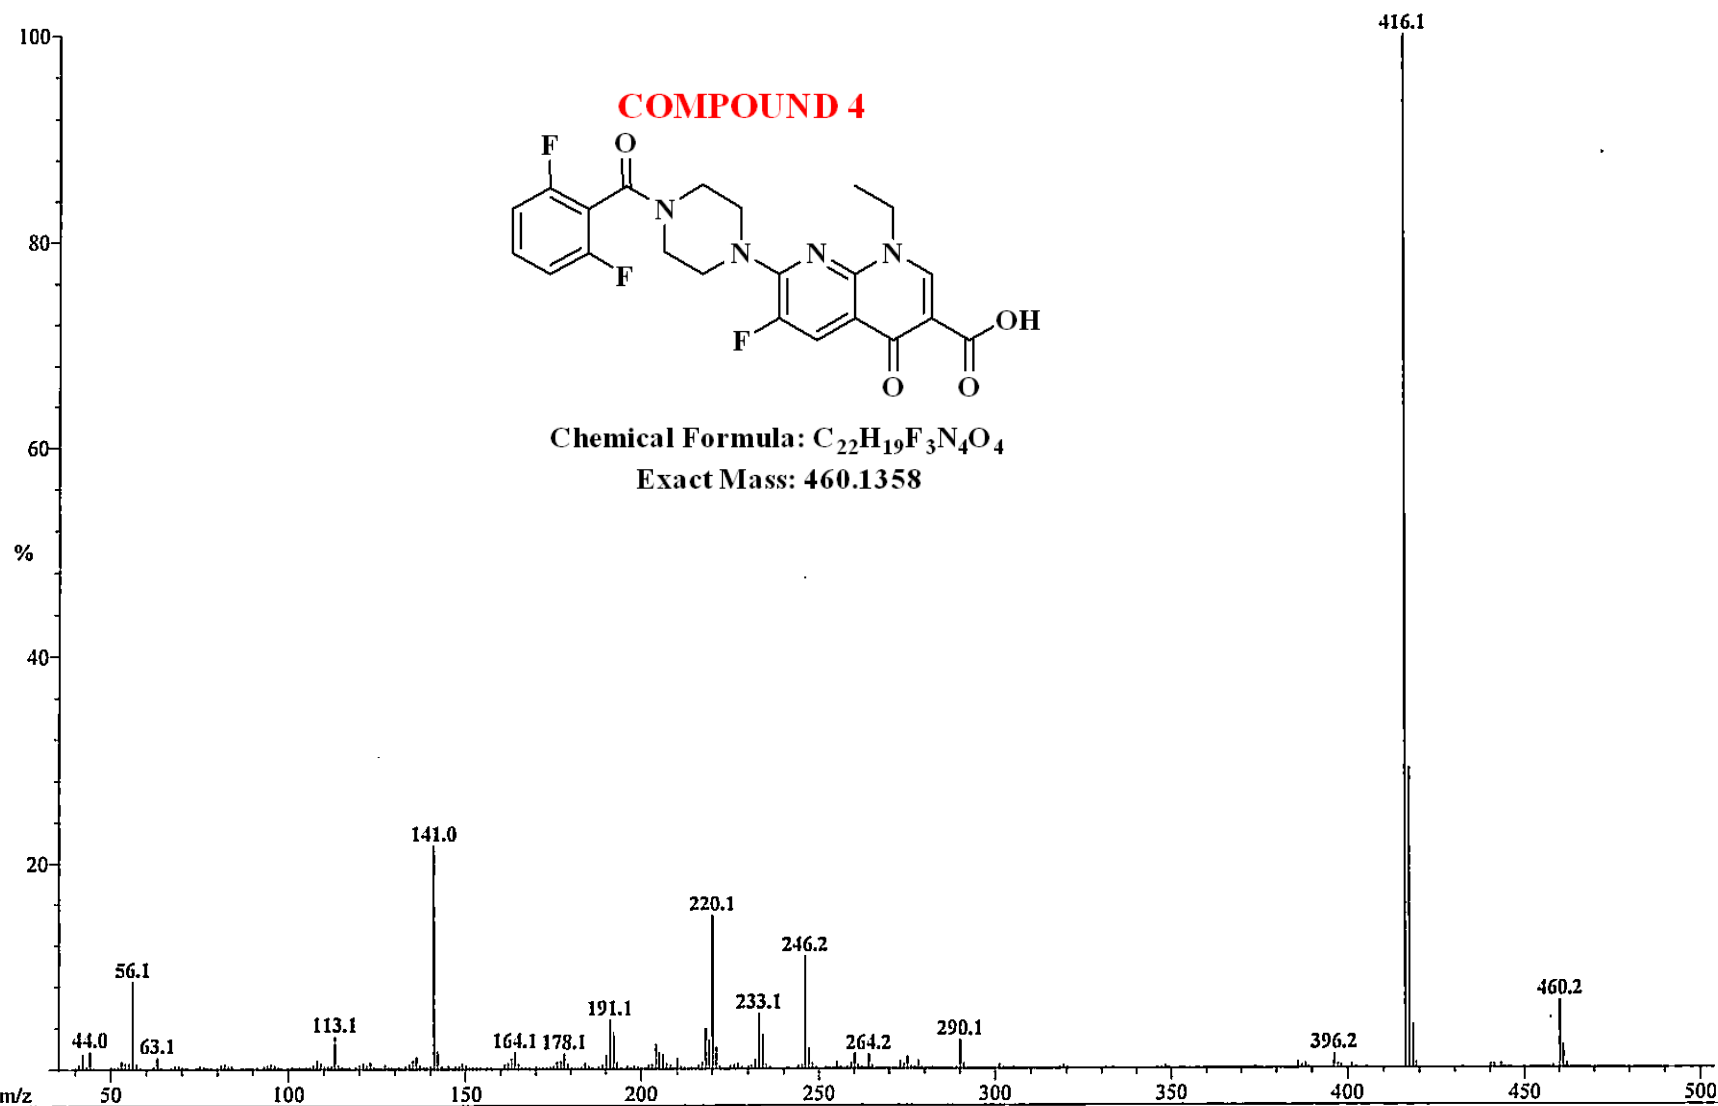

File: RSE-12-MS Date Run: 11-11-2021 (Time Run: 15:24:52)  
Sample: MEHWISH SOLANGI / DR. KHALID KHAN  
Instrument: JEOL 600H-1  
Inlet: Direct Probe Ionization mode: EI+

Run By: MASS LAB 104

Scan: 24  
Base: m/z 416; 100%FS TIC: 3461504

#Ions: 238

Threshold: .3% of Base

Displayed TIC: 3461504

| Mass | %Base | Mass  | %Base | Mass  | %Base | Mass  | %Base | Mass  | %Base | Mass  | %Base | Mass  | %Base | Mass  | %Base |
|------|-------|-------|-------|-------|-------|-------|-------|-------|-------|-------|-------|-------|-------|-------|-------|
| 41.1 | .6    | 84.1  | .3    | 127.1 | .6    | 163.1 | 1.1   | 196.1 | .4    | 222.1 | .3    | 260.1 | 1.5   | 396.2 | 1.5   |
| 42.1 | 1.5   | 93.0  | .3    | 133.1 | .3    | 164.1 | 1.7   | 198.1 | .3    | 225.1 | .4    | 261.2 | .4    | 397.2 | .5    |
| 43.1 | .3    | 94.0  | .4    | 134.1 | .5    | 165.1 | .6    | 202.1 | .4    | 226.1 | .5    | 264.2 | 1.4   | 398.2 | .4    |
| 44.0 | 1.8   | 95.1  | .5    | 135.1 | .9    | 170.1 | .3    | 203.1 | .5    | 227.1 | .6    | 265.1 | .4    | 401.2 | .5    |
| 53.1 | .8    | 96.1  | .4    | 136.1 | 1.3   | 175.1 | .4    | 204.1 | 2.5   | 230.1 | .3    | 273.1 | .8    | 416.1 | 100.0 |
| 54.1 | .6    | 107.1 | .4    | 137.1 | .5    | 176.1 | .8    | 205.1 | 1.6   | 231.1 | .4    | 274.2 | .6    | 417.2 | 29.1  |
| 55.1 | .7    | 108.1 | .9    | 140.0 | .3    | 177.1 | .8    | 206.1 | 1.5   | 232.1 | 1.0   | 275.2 | 1.2   | 418.2 | 4.3   |
| 56.1 | 8.5   | 109.1 | .6    | 141.0 | 21.8  | 178.1 | 1.5   | 207.1 | .6    | 233.1 | 5.4   | 276.1 | .4    | 419.1 | .6    |
| 57.1 | .6    | 110.1 | .3    | 142.1 | 1.8   | 179.1 | .6    | 208.1 | .5    | 234.1 | 3.3   | 278.2 | .9    | 440.2 | .4    |
| 63.1 | 1.2   | 111.1 | .3    | 143.1 | .3    | 183.1 | .3    | 210.1 | 1.1   | 235.1 | .5    | 290.1 | 2.8   | 441.2 | .5    |
| 68.1 | .4    | 112.1 | .4    | 145.1 | .4    | 184.1 | .6    | 211.1 | .3    | 244.2 | .3    | 291.1 | .6    | 443.2 | .6    |
| 69.1 | .3    | 113.1 | 3.2   | 147.1 | .3    | 185.1 | .3    | 216.1 | .5    | 245.2 | .4    | 301.2 | .5    | 458.2 | .3    |
| 75.1 | .3    | 114.1 | .5    | 148.1 | .4    | 189.1 | .5    | 217.1 | .7    | 246.2 | 10.9  | 319.2 | .4    | 460.2 | 6.6   |
| 76.0 | .3    | 120.1 | .5    | 149.1 | .6    | 190.1 | 1.4   | 218.1 | 3.9   | 247.2 | 2.0   | 348.2 | .4    | 461.2 | 2.3   |
| 81.1 | .5    | 121.1 | .7    | 150.1 | .5    | 191.1 | 4.8   | 219.1 | 2.9   | 248.2 | .7    | 386.1 | .7    | 462.2 | .6    |
| 82.0 | .6    | 122.1 | .4    | 161.1 | .5    | 192.1 | 3.6   | 220.1 | 14.9  | 255.2 | .7    | 387.3 | .4    |       |       |
| 83.1 | .4    | 123.1 | .7    | 162.1 | .7    | 193.1 | .7    | 221.1 | 2.2   | 259.2 | .6    | 388.2 | .6    |       |       |



File: RSE-19-MS  
Sample: MEHWISH SOLANGI / DR. KHALID KHAN  
Instrument: JEOL 600H-1  
Inlet: Direct Probe

Date Run: 11-11-2021 (Time Run: 15:12:13)

Ionization mode: EI+

Run By: MASS LAB 104

Scan: 31

Base: m/z 386; 100%FS TIC: 5723280

#Ions: 331

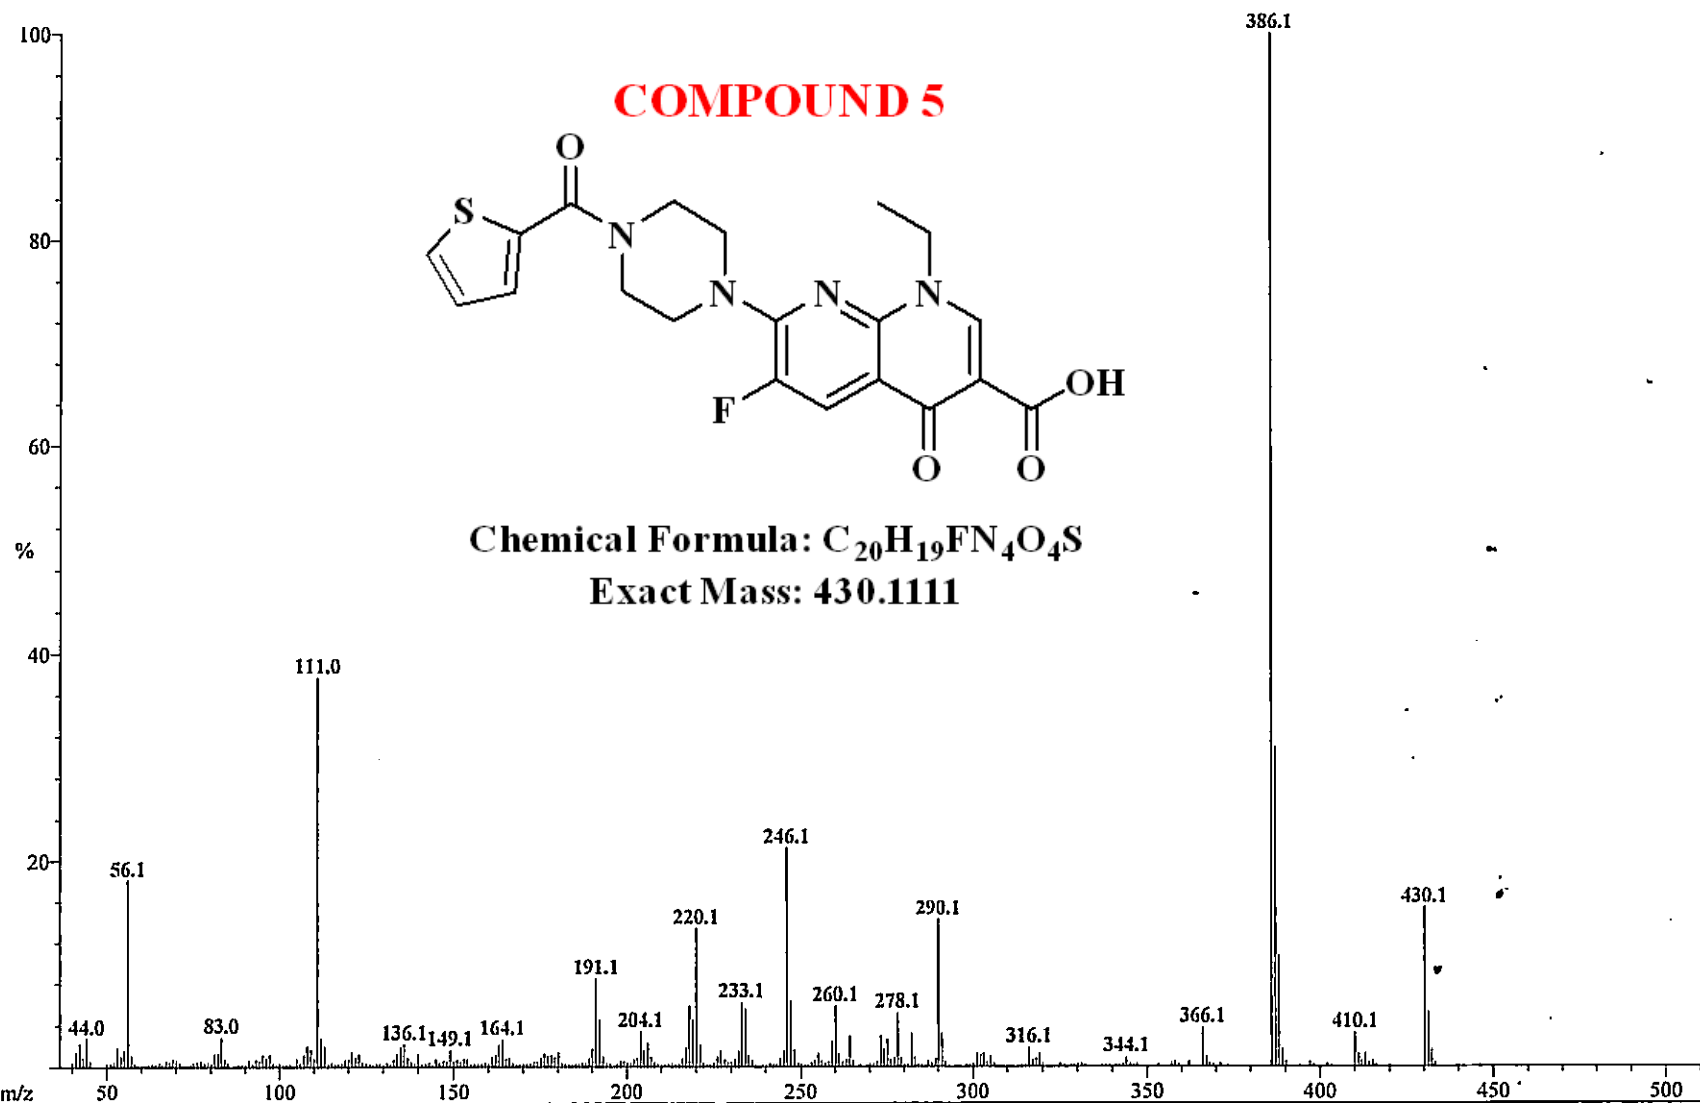

File: RSE-19-MS Date Run: 11-11-2021 (Time Run: 15:12:13)  
Sample: MEHWISH SOLANGI / DR. KHALID KHAN  
Instrument: JEOL 600H-1  
Inlet: Direct Probe Ionization mode: EI+

Run By: MASS LAB 104

Scan: 31  
Base: m/z 386; 100%FS TIC: 5723280

#Ions: 331

Threshold: 1% of Base

Displayed TIC: 5723280

| Mass | %Base | Mass  | %Base | Mass  | %Base | Mass  | %Base | Mass  | %Base | Mass  | %Base | Mass  | %Base | Mass  | %Base |
|------|-------|-------|-------|-------|-------|-------|-------|-------|-------|-------|-------|-------|-------|-------|-------|
| 41.1 | 1.5   | 95.1  | 1.2   | 135.1 | 2.0   | 180.1 | 1.4   | 220.1 | 13.4  | 248.2 | 1.7   | 290.1 | 14.3  | 387.1 | 31.0  |
| 42.1 | 2.3   | 97.1  | 1.3   | 136.1 | 2.3   | 190.1 | 1.8   | 221.1 | 2.1   | 255.1 | 1.3   | 291.1 | 3.3   | 388.1 | 10.7  |
| 44.0 | 2.8   | 107.1 | 1.2   | 140.0 | 1.3   | 191.1 | 8.6   | 226.1 | 1.0   | 259.1 | 2.6   | 301.2 | 1.3   | 389.2 | 1.8   |
| 53.1 | 1.9   | 108.1 | 2.1   | 149.1 | 1.7   | 192.1 | 4.5   | 227.1 | 1.6   | 260.1 | 5.9   | 302.1 | 1.2   | 410.1 | 3.3   |
| 54.1 | 1.0   | 109.1 | 1.7   | 161.1 | 1.0   | 193.1 | 1.1   | 232.1 | 1.6   | 261.1 | 1.3   | 303.1 | 1.4   | 411.1 | 1.3   |
| 55.1 | 1.6   | 111.0 | 37.8  | 162.1 | 1.2   | 204.1 | 3.4   | 233.1 | 6.3   | 264.1 | 3.0   | 305.2 | 1.1   | 413.1 | 1.4   |
| 56.1 | 18.2  | 112.1 | 2.8   | 163.1 | 2.2   | 205.1 | 1.6   | 234.1 | 5.6   | 273.2 | 3.1   | 316.1 | 1.9   | 430.1 | 15.5  |
| 57.1 | 1.2   | 113.0 | 2.0   | 164.1 | 2.7   | 206.1 | 2.3   | 235.1 | 1.1   | 274.1 | 1.8   | 319.1 | 1.3   | 431.2 | 5.3   |
| 81.1 | 1.3   | 121.1 | 1.6   | 176.1 | 1.3   | 217.1 | 1.9   | 245.2 | 1.7   | 275.2 | 2.7   | 366.1 | 3.8   | 432.1 | 1.7   |
| 82.1 | 1.3   | 123.1 | 1.3   | 177.1 | 1.1   | 218.1 | 5.9   | 246.1 | 21.3  | 278.1 | 5.2   | 367.1 | 1.0   |       |       |
| 83.0 | 2.9   | 134.1 | 1.3   | 178.1 | 1.2   | 219.1 | 4.6   | 247.2 | 6.4   | 282.1 | 3.3   | 386.1 | 100.0 |       |       |
